# Supplementary material for: Compartment-specific transcriptomics in a reef-building coral exposed to elevated temperatures
Source: PubMed Central journal article supplement — Mol Ecol. 2014 Nov 27;23(23):5816–30. doi: 10.1111/mec.12982 (PMC4265203; doi:10.1111/mec.12982), 2014-11-27

**Table S1. Differentially expressed gene quantities compared across the two predominant eukaryotic compartments of the**

***Pocillopora damicornis* coral holobiont.** When the “More responsive compartment” has been left blank, this indicates that the

differentially expressed gene (DEG) percentage (*i.e.*, “% DEGs;” #DEGs/total contig count x 100) from each compartment was

similar. C=control temperature (27°C), H=high temperature (30°C), C2=controls sampled after 2 weeks, H2=high temperature corals

sampled after 2 weeks, C36=control corals sampled after 36 weeks, H36=high temperature corals sampled after 36 weeks.

| Comparison                                                                              | $\alpha$ level | #contigs (%)   | fold change<br>or comparison | #contigs (%)   | #coral contigs<br>(% DEGs) | # <i>Symbiodinium</i><br>contigs (% DEGs) | Coral vs. <i>Symbiodinium</i><br>% DEGs two-sample<br>proportion test Z-score | More<br>responsive<br>compartment |                     |
|-----------------------------------------------------------------------------------------|----------------|----------------|------------------------------|----------------|----------------------------|-------------------------------------------|-------------------------------------------------------------------------------|-----------------------------------|---------------------|
| C vs. H                                                                                 | $10^0$         | 236,435 (100%) | 10                           | 1,564 (0.661%) | 564 (1.17%)                | 66 (0.429%)                               | 8.070***                                                                      | host coral                        |                     |
|                                                                                         | $10^{-1}$      | 35,773 (15.1%) | 10                           | 590 (0.250%)   | 157 (0.326%)               | 39 (0.254%)                               | 1.40                                                                          |                                   |                     |
|                                                                                         | $10^{-2}$      | 5,092 (2.15%)  | 10                           | 133 (0.056%)   | 28 (0.058%)                | 9 (0.059%)                                | 0.022                                                                         |                                   |                     |
|                                                                                         | $10^{-3}$      | 897 (0.379%)   | 10                           | 32 (0.014%)    | 4 (<0.01%)                 | 3 (<0.01%)                                | 1.15                                                                          |                                   |                     |
|                                                                                         | $10^{-4}$      | 265 (0.112%)   | 2                            | 49 (0.021%)    | 8 (0.017%)                 | 6 (0.039%)                                | 1.63                                                                          |                                   |                     |
|                                                                                         | $10^{-5}$      | 109 (0.046%)   | 2                            | 10 (<0.01%)    | 1 (<0.01%)                 | 0                                         | 0.565                                                                         |                                   |                     |
|                                                                                         | $10^{-6}$      | 80 (0.034%)    | C=0, H>0                     | 65 (0.028%)    | 1 (<0.01%)                 | 6 (0.039%)                                | 3.80*                                                                         |                                   | <i>Symbiodinium</i> |
|                                                                                         |                |                | C>0, H=0                     | 13 (<0.01%)    | 2 (<0.01%)                 | 0                                         | 0.799                                                                         |                                   |                     |
|                                                                                         | $10^{-7}$      | 58 (0.025%)    | C=0, H>0                     | 52 (0.022%)    | 1 (<0.01%)                 | 6 (0.039%)                                | 3.80**                                                                        |                                   | <i>Symbiodinium</i> |
|                                                                                         |                |                | C>0, H=0                     | 5 (<0.01%)     | 1 (<0.01%)                 | 0                                         | 0.565                                                                         |                                   |                     |
| $10^{-8}$                                                                               | 43 (0.018%)    | C=0, H>0       | 40 (0.017%)                  | 1 (<0.01%)     | 6 (0.039%)                 | 3.80**                                    | <i>Symbiodinium</i>                                                           |                                   |                     |
|                                                                                         |                | C>0, H=0       | 3 (<0.01%)                   | 0              | 0                          | no annotated results                      |                                                                               |                                   |                     |
| $10^{-9}$                                                                               | 28 (0.012%)    | C=0, H>0       | 25 (0.011%)                  | 0              | 3 (<0.01%)                 | 3.068*                                    | <i>Symbiodinium</i>                                                           |                                   |                     |
|                                                                                         |                | C>0, H=0       | 3 (<0.01%)                   | 0              | 0                          | no annotated results                      |                                                                               |                                   |                     |
| No annotated contigs were differentially expressed at an $\alpha$ level of $10^{-10}$ . |                |                |                              |                |                            |                                           |                                                                               |                                   |                     |
| C2 vs. H2                                                                               | $10^0$         | 236,435 (100%) | 10                           | 1,260 (0.533%) | 546 (1.13%)                | 63 (0.410%)                               | 8.010***                                                                      | host coral                        |                     |
|                                                                                         | $10^{-1}$      | 16,788 (7.10%) | 10                           | 208 (0.088%)   | 57 (0.118%)                | 15 (0.098%)                               | 0.662                                                                         |                                   |                     |
|                                                                                         | $10^{-2}$      | 1,546 (0.654%) | 10                           | 49 (0.021%)    | 13 (0.027%)                | 2 (0.013%)                                | 0.981                                                                         |                                   |                     |
|                                                                                         | $10^{-3}$      | 232 (0.098%)   | 10                           | 9 (<0.01%)     | 2 (<0.01%)                 | 1 (<0.01%)                                | 0.371                                                                         |                                   |                     |
| 2                                                                                       |                |                | 43 (0.018%)                  | 9 (0.019%)     | 5 (0.032%)                 | 1.01                                      |                                                                               |                                   |                     |

|             |                  |                                                                                                |              |                |              |                      |                      |                     |
|-------------|------------------|------------------------------------------------------------------------------------------------|--------------|----------------|--------------|----------------------|----------------------|---------------------|
|             |                  | C=0, H>0                                                                                       | 118 (0.050%) | 5 (0.010%)     | 12 (0.078%)  | 4.47**               | <i>Symbiodinium</i>  |                     |
|             |                  | C>0, H=0                                                                                       | 11 (<0.01%)  | 2 (<0.01%)     | 0            | 0.799                |                      |                     |
|             | 10 <sup>-4</sup> | 15 (<0.01%)                                                                                    | C=0, H>0     | 1 (<0.01%)     | 0            | no annotated results |                      |                     |
|             |                  |                                                                                                | C>0, H=0     | 2 (<0.01%)     | 1 (<0.01%)   | 0.565                |                      |                     |
|             | 10 <sup>-5</sup> | No annotated contigs were differentially expressed at an $\alpha$ level of 10 <sup>-5</sup> .  |              |                |              |                      |                      |                     |
| C36 vs. H36 | 10 <sup>0</sup>  | 236,435 (100%)                                                                                 | 10           | 1,656 (0.700%) | 579 (1.20%)  | 109 (0.709%)         | 5.13***              | host coral          |
|             | 10 <sup>-1</sup> | 9,708 (4.11%)                                                                                  | 10           | 265 (0.112%)   | 81 (0.168%)  | 31 (0.202%)          | 0.868                |                     |
|             | 10 <sup>-2</sup> | 735 (0.311%)                                                                                   | 10           | 56 (0.024%)    | 15 (0.031%)  | 9 (0.059%)           | 1.53                 |                     |
|             | 10 <sup>-3</sup> | 54 (0.023%)                                                                                    | 10           | 12 (<0.01%)    | 5 (0.010%)   | 3 (<0.01%)           | 0.881                |                     |
|             |                  |                                                                                                | 2            | 36 (0.015%)    | 8 (0.017%)   | 7 (0.046%)           | 2.04                 |                     |
|             |                  |                                                                                                | C=0, H>0     | 5 (<0.01%)     | 4 (<0.01%)   | 0                    | 1.13                 |                     |
|             |                  |                                                                                                | C>0, H=0     | 5 (<0.01%)     | 2 (<0.01%)   | 0                    | 0.799                |                     |
|             | 10 <sup>-4</sup> | 6 (<0.01%)                                                                                     | 2            | 1 (<0.01%)     | 0            | 0                    | no annotated results |                     |
|             |                  |                                                                                                | C=0, H>0     | 2 (<0.01%)     | 2 (<0.01%)   | 0                    | 0.799                |                     |
|             |                  |                                                                                                | C>0, H=0     | 0              | 0            | 0                    | no annotated results |                     |
|             | 10 <sup>-5</sup> | No annotated contigs were differentially expressed at an $\alpha$ level of 10 <sup>-5</sup> .  |              |                |              |                      |                      |                     |
| 2 vs. 36    | 10 <sup>0</sup>  | 236,435 (100%)                                                                                 | 10           | 3,195 (1.35%)  | 911 (1.89%)  | 219 (1.42%)          | 3.80**               | host coral          |
|             | 10 <sup>-1</sup> | 70,938 (30.0%)                                                                                 | 10           | 2,008 (0.849%) | 460 (0.954%) | 169 (1.099%)         | 1.59                 |                     |
|             | 10 <sup>-2</sup> | 30,884 (13.1%)                                                                                 | 10           | 529 (0.224%)   | 99 (0.205%)  | 52 (0.338%)          | 2.95*                | <i>Symbiodinium</i> |
|             | 10 <sup>-3</sup> | 13,086 (5.53%)                                                                                 | 10           | 139 (0.059%)   | 25 (0.052%)  | 13 (0.085%)          | 1.45                 |                     |
|             | 10 <sup>-4</sup> | 3,202 (1.35%)                                                                                  | 10           | 39 (0.017%)    | 9 (0.019%)   | 5 (0.032%)           | 1.01                 |                     |
|             | 10 <sup>-5</sup> | 516 (0.218%)                                                                                   | 10           | 8 (<0.01%)     | 2 (<0.01%)   | 2 (<0.01%)           | 1.21                 |                     |
|             |                  |                                                                                                | 2            | 360 (0.152%)   | 45 (0.093%)  | 108 (0.702%)         | 13.4***              | <i>Symbiodinium</i> |
|             | 10 <sup>-6</sup> | 126 (0.053%)                                                                                   | 2            | 36 (0.015%)    | 2 (<0.01%)   | 7 (0.046%)           | 3.76**               | <i>Symbiodinium</i> |
|             | 10 <sup>-7</sup> | 60 (0.025%)                                                                                    | 2            | 3 (<0.01%)     | 1 (<0.01%)   | 1 (<0.01%)           | 0.853                |                     |
|             |                  |                                                                                                | C=0, H>0     | 14 (<0.01%)    | 1 (<0.01%)   | 0                    | 0.565                |                     |
|             |                  |                                                                                                | C>0, H=0     | 43 (0.018%)    | 1 (<0.01%)   | 6 (0.039%)           | 3.80**               | <i>Symbiodinium</i> |
|             | 10 <sup>-8</sup> | 42 (0.018%)                                                                                    | C=0, H>0     | 3 (<0.01%)     | 0            | 0                    | no annotated results |                     |
|             |                  |                                                                                                | C>0, H=0     | 39 (0.017%)    | 1 (<0.01%)   | 6 (0.039%)           | 3.80**               | <i>Symbiodinium</i> |
|             | 10 <sup>-9</sup> | 28 (0.012%)                                                                                    | C=0, H>0     | 25             | 0            | 3 (0.02%)            | 3.10**               | <i>Symbiodinium</i> |
|             |                  |                                                                                                | C>0, H=0     | 3 (<0.01%)     | 0            | 0                    | no annotated results |                     |
|             |                  | No annotated contigs were differentially expressed at an $\alpha$ level of 10 <sup>-10</sup> . |              |                |              |                      |                      |                     |

\* $p < 0.01$ . \*\* $p < 0.001$ . \*\*\* $p < 0.0001$ .

**Table S2. Repeated-measures ANOVA results of host coral gene expression.** Full gene names and the respective functional categories can be found in Table 1. Statistically significant differences ( $p < 0.05$ ) have been underlined for emphasis.  $R^2$  values between data derived from the two gene expression quantification techniques can be found in Figs. S1 and S2. “HSD” = honestly significant difference.

| Gene             | Illumina-derived data |                  |                                | Fig. | Real-time PCR-derived data |                  |      | Fig. |
|------------------|-----------------------|------------------|--------------------------------|------|----------------------------|------------------|------|------|
|                  | source of variation   | Exact $F$        | $p$                            |      | Tukey's HSD tests          | Exact $F$        | $p$  |      |
| <i>ca</i>        |                       |                  |                                | S1a  |                            |                  |      | S1b  |
| treatment        | 4.0                   | 0.12             |                                |      | 3.8                        | 0.15             |      |      |
| time             | 15                    | <u>0.019</u>     | 36>2                           |      | 0.29                       | 0.63             |      |      |
| treatment x time | 8.4                   | <u>0.044</u>     | H36(A)>all others(B)           |      | 1.8                        | 0.27             |      |      |
| <i>amylase</i>   |                       |                  |                                | S1d  |                            |                  |      | S1e  |
| treatment        | 42                    | <u>0.0029</u>    | high>control                   |      | 0.96 <sup>a</sup>          | 0.40             |      |      |
| time             | 79                    | <u>&lt;0.001</u> | 2>36                           |      | 59                         | <u>&lt;0.01</u>  | 2>36 |      |
| treatment x time | 14                    | <u>0.020</u>     | H2(A), C2(B), H36(BC), C36(C)  |      | 1.04                       | 0.38             |      |      |
| <i>iontrans</i>  |                       |                  |                                | S1g  |                            |                  |      | S1h  |
| treatment        | 13                    | <u>0.022</u>     | high>control                   |      | 0.18 <sup>a</sup>          | 0.72             |      |      |
| time             | 43                    | <u>&lt;0.01</u>  | 36>2                           |      | 0.078                      | 0.81             |      |      |
| treatment x time | 20.                   | <u>0.011</u>     | H36(A), C36(B), C2(BC), H2(C)  |      | 10.3                       | 0.084            |      |      |
| <i>sftase</i>    |                       |                  |                                | S1j  |                            |                  |      | S1k  |
| treatment        | 2.0 <sup>b</sup>      | 0.23             |                                |      | 0.01                       | 0.93             |      |      |
| time             | 30.                   | <u>&lt;0.01</u>  | 36>2                           |      | 13                         | <u>0.038</u>     |      |      |
| treatment x time | 4.5                   | 0.102            | C36(A), H36(AB), H2(BC), C2(C) |      | 18                         | <u>0.024</u>     |      |      |
| <i>mcp</i>       |                       |                  |                                | S1m  |                            |                  |      | S1n  |
| treatment        | 1300                  | <u>&lt;0.001</u> | high>control                   |      | 0.27 <sup>a</sup>          | 0.641            |      |      |
| time             | 42                    | <u>&lt;0.01</u>  | 2>36                           |      | 260                        | <u>&lt;0.001</u> | 2>36 |      |
| treatment x time | 6.7                   | 0.061            | H2(A), C2(B), H36(BC), C36(C)  |      | 1.8                        | 0.278            |      |      |
| <i>lectin</i>    |                       |                  |                                | S1p  |                            |                  |      | S1q  |
| treatment        | 150                   | <u>&lt;0.001</u> | high>control                   |      | 6.0 <sup>a</sup>           | 0.071            |      |      |
| time             | 5.8                   | 0.074            | 36>2                           |      | 1.2                        | 0.34             |      |      |

|                    |                  |       |                  |                              |     |                   |              |                                |     |
|--------------------|------------------|-------|------------------|------------------------------|-----|-------------------|--------------|--------------------------------|-----|
| <i>selectin</i>    | treatment x time | 6.1   | 0.069            | H36(A)>all others(B)         | S1s | 1.4               | 0.31         |                                | S1t |
|                    | treatment        | 5.7   | 0.075            |                              |     | 1.0 <sup>a</sup>  | 0.38         |                                |     |
|                    | time             | 8.2   | <u>0.046</u>     | 2>36                         |     | 21                | <u>0.020</u> | 2>36                           |     |
| <i>hsp70</i>       | treatment x time | 10.   | <u>0.034</u>     | H2(A)>all others (B)         | S2a | 0.90              | 0.41         | H2(A), C2(AB), H36(AB), C36(B) | S2b |
|                    | treatment        | 1.2   | 0.34             |                              |     | 0.36              | 0.58         |                                |     |
|                    | time             | 8.6   | <u>0.043</u>     | 36>2                         |     | 0.27              | 0.63         |                                |     |
| <i>cu-zn-sod</i>   | treatment x time | 0.90  | 0.40             |                              | S2d | 0.015             | 0.91         |                                | S2e |
|                    | treatment        | 5.0   | 0.090            | control>high                 |     | 9.1 <sup>b</sup>  | 0.057        |                                |     |
|                    | time             | 24    | <u>&lt;0.01</u>  | 36>2                         |     | 0.6               | 0.50         |                                |     |
| <i>vwfa</i>        | treatment x time | 0.039 | 0.85             |                              | S2g | 1.4               | 0.33         |                                | S2h |
|                    | treatment        | 17    | <u>0.015</u>     | high>control                 |     | 0.12 <sup>b</sup> | 0.75         |                                |     |
|                    | time             | 0.28  | 0.63             |                              |     | 0.39              | 0.58         |                                |     |
| <i>DNAp</i>        | treatment x time | 71    | <u>0.001</u>     | H36(A), C2(A), H2(B), C36(B) | S2j | 0.20              | 0.69         |                                | S2k |
|                    | treatment        | 102   | <u>&lt;0.001</u> | control>high                 |     | 1.5 <sup>a</sup>  | 0.29         |                                |     |
|                    | time             | 32    | <u>&lt;0.01</u>  | 36>2                         |     | 8.3               | <u>0.045</u> | 36>2                           |     |
| <i>smc-csp</i>     | treatment x time | <0.01 | 0.93             | C36(A), C2(B), H36(B), H2(C) | S2m | 0.42              | 0.55         |                                | S2n |
|                    | treatment        | 150   | <u>&lt;0.001</u> | control>high                 |     | 0.25              | 0.65         |                                |     |
|                    | time             | 2.2   | 0.21             |                              |     | 21                | <u>0.019</u> |                                |     |
| <i>gfp-like cp</i> | treatment x time | 0.65  | 0.47             | C2(A), C36(A), H2(B), H36(B) | S2p | 21                | <u>0.019</u> |                                | S2q |
|                    | treatment        | 6.6   | 0.062            |                              |     | 3.2 <sup>a</sup>  | 0.17         |                                |     |
|                    | time             | 7.1   | 0.056            | 36>2                         |     | 0.046             | 0.84         |                                |     |
|                    | treatment x time | 5.7   | <u>0.076</u>     | H36(A)>all others(B)         |     | 4.7               | 0.12         | H36(A), C2(AB), H2(AB), C36(B) |     |

<sup>a</sup>log-transformed data. <sup>b</sup>rank-transformed data.

**Table S3. Repeated-measures ANOVA results of *Symbiodinium* gene expression.** Full gene names and the respective functional categories can be found in Table 1. Statistically significant differences ( $p < 0.05$ ) are underlined for emphasis.  $R^2$  values between data derived from the two gene expression quantification techniques can be found in Figs. S3 and S4. Genes for which both techniques yielded significant temperature treatment effects (in the model as a whole or in the post-hoc tests) have been emphasized in bold font.

“HSD” = honestly significant difference.

| Gene                           | Illumina-derived data |                  |                                | Fig. | Real-time PCR-derived data |                 |                                | Fig. |
|--------------------------------|-----------------------|------------------|--------------------------------|------|----------------------------|-----------------|--------------------------------|------|
|                                | source of variation   | Exact <i>F</i>   | <i>p</i>                       |      | Tukey’s HSD tests          | Exact <i>F</i>  | <i>p</i>                       |      |
| <i>transketolase</i>           |                       |                  |                                | S3a  |                            |                 |                                | S3b  |
| treatment                      | 22 <sup>a</sup>       | <u>0.043</u>     |                                |      | 1.0 <sup>a</sup>           | 0.42            |                                |      |
| time                           | 13                    | 0.071            | 2>36                           |      | 32                         | <u>0.030</u>    | 2>36                           |      |
| treatment x time               | 0.033                 | 0.87             | C2(A), H2(AB), H36(BC), C36(C) |      | 5.2                        | 0.15            | C2(A), H2(AB), H36(B), C36(B)  |      |
| <i>zifIII</i>                  |                       |                  |                                | S3d  |                            |                 |                                | S3e  |
| treatment                      | 21                    | <u>&lt;0.01</u>  | control>high                   |      | 15 <sup>a</sup>            | <u>0.060</u>    | control>high                   |      |
| time                           | 32                    | <u>&lt;0.01</u>  | 2>36                           |      | 12                         | 0.076           | 2>36                           |      |
| treatment x time               | 11                    | <u>0.029</u>     | C2(A)>all others(B)            |      | 2.0                        | 0.29            | C2(A)>all others (B)           |      |
| <i>nrt2</i>                    |                       |                  |                                | S3g  |                            |                 |                                | S3h  |
| treatment                      | 0.031                 | 0.87             |                                |      | 0.18                       | 0.69            |                                |      |
| time                           | 81                    | <u>&lt;0.001</u> | 2>36                           |      | 22                         | <u>&lt;0.01</u> |                                |      |
| treatment x time               | 0.015                 | 0.91             | C2(A), H2(A), C36 (B), H36(B)  |      | 0.21                       | 0.67            | C2(A), H2(AB), H36(BC), C36(C) |      |
| <i>vdic</i>                    |                       |                  |                                | S3j  |                            |                 |                                | S3k  |
| treatment                      | 25                    | <u>&lt;0.01</u>  | high>control                   |      | 0.077                      | 0.81            |                                |      |
| time                           | 78                    | <u>&lt;0.001</u> | 2>36                           |      | 28                         | <u>0.035</u>    | 2>36                           |      |
| treatment x time               | 9.4                   | <u>0.038</u>     | H2(A), C2(B), H36(C), C36(C)   |      | 2.0                        | 0.29            | C2(AB), H2(A), H36(AB), C36(A) |      |
| <i>K<sup>+</sup> channel</i>   |                       |                  |                                | S3m  |                            |                 |                                | S3n  |
| treatment                      | 2.9 <sup>b</sup>      | 0.16             |                                |      | <0.01                      | 0.98            |                                |      |
| time                           | 88                    | <u>&lt;0.001</u> | 2>36                           |      | 27                         | <u>0.036</u>    | 2>36                           |      |
| treatment x time               | 4.6                   | 0.099            | H2(A), C2(A), C36(B), H36(B)   |      | 0.81                       | 0.46            |                                |      |
| <i>Ca<sup>2+</sup> channel</i> |                       |                  |                                | S3p  |                            |                 |                                | S3q  |

|                  |                    |                 |                                |                   |                 |                                |                   |
|------------------|--------------------|-----------------|--------------------------------|-------------------|-----------------|--------------------------------|-------------------|
| treatment        | 9.5                | <u>0.037</u>    | control>high                   | 0.10 <sup>b</sup> | 0.78            |                                |                   |
| time             | 34                 | <u>&lt;0.01</u> | 2>36                           | 7.8               | 0.11            | 2>36                           |                   |
| treatment x time | 3.8                | 0.12            | C2(A)>all others(B)            | 0.17              | 0.72            | C2(A), H2(AB), H36(AB), C36(B) |                   |
| <i>rbcL</i>      |                    |                 |                                |                   |                 |                                | S3s<br>S3t        |
| treatment        | 11 <sup>c</sup>    | <u>0.030</u>    | high>control                   | 0.32              | 0.60            |                                |                   |
| time             | 45                 | <u>&lt;0.01</u> | 2>36                           | 24                | <u>&lt;0.01</u> | 2>36                           |                   |
| treatment x time | 0.058              | 0.82            | H2(A), C2(A), H36(B), C36(B)   | 0.019             | 0.90            | H2(A), C2(AB), H36(BC), C36(C) |                   |
| <i>psl</i>       |                    |                 |                                |                   |                 |                                | S3v<br>S3w<br>S3z |
| treatment        | 12                 | <u>0.027</u>    | high>control                   | 6.7 <sup>a</sup>  | 0.061           |                                |                   |
| time             | 49                 | <u>0.002</u>    | 2>36                           | 26                | <u>&lt;0.01</u> | 2>36                           |                   |
| treatment x time | 0.17               | 0.70            | H2(A), C2(AB), H36(BC), C36(C) | 1.9               | 0.24            | H2(A), C2(A), H36(AB), C36(B)  |                   |
| <i>pgpase</i>    |                    |                 |                                |                   |                 |                                | S3y               |
| treatment        | 3.0                | 0.16            |                                | 0.32              | 0.60            |                                |                   |
| time             | 16                 | <u>0.016</u>    | 2>36                           | 15                | <u>0.018</u>    | 2>36                           |                   |
| treatment x time | 0.29               | 0.62            | H2(A), C2(A), H36(AB), C36(B)  | 0.034             | 0.86            | H2(A), C2(AB), H36(AB), C36(B) |                   |
| <i>hsp40</i>     |                    |                 |                                |                   |                 |                                | S4a<br>S4b        |
| treatment        | 0.068 <sup>c</sup> | 0.81            |                                | 0.63 <sup>a</sup> | 0.49            |                                |                   |
| time             | 32                 | <u>&lt;0.01</u> | 36>2                           | 5.2               | 0.11            |                                |                   |
| treatment x time | 0.39               | 0.57            |                                | 0.064             | 0.82            |                                |                   |
| <i>hsp70</i>     |                    |                 |                                |                   |                 |                                | S4d<br>S4e        |
| treatment        | 9.3                | <u>0.038</u>    | high>control                   | 7.4               | 0.053           |                                |                   |
| time             | 34                 | <u>&lt;0.01</u> | 2>36                           | 30                | <u>&lt;0.01</u> | 2>36                           |                   |
| treatment x time | <0.01              | 0.94            | H2(A), C2(AB), H36(BC), C36(C) | 2.8               | 0.17            | C2(A), H2(A), H36(B), C36(B)   |                   |
| <i>hsp90</i>     |                    |                 |                                |                   |                 |                                | S4g<br>S4h        |
| treatment        | 13                 | <u>0.023</u>    | high>control                   | 0.66 <sup>a</sup> | 0.48            |                                |                   |
| time             | 32                 | <u>&lt;0.01</u> | 2>36                           | 66                | <u>&lt;0.01</u> |                                |                   |
| treatment x time | 0.17               | 0.71            | H2(A), C2(B), H36(B), C36(C)   | 2.7               | 0.20            | C2(A), H2(A), H36(B), C36(B)   |                   |
| <i>apx1</i>      |                    |                 |                                |                   |                 |                                | S4j<br>S4k        |
| treatment        | 0.14               | 0.49            |                                | 0.16 <sup>a</sup> | 0.71            |                                |                   |
| time             | 17                 | <u>0.014</u>    | 2>36                           | 34                | <u>&lt;0.01</u> | 2>36                           |                   |
| treatment x time | 0.17               | 0.70            | C2(A), H2(A), H36(AB), C36(B)  | 0.901             | 0.40            | C2(A), H2(A), H36(B), C36(B)   |                   |
| <i>ubiq1g</i>    |                    |                 |                                |                   |                 |                                | S4m<br>S4n        |
| treatment        | 32                 | <u>&lt;0.01</u> | high>control                   | 14                | <u>0.033</u>    | high>control                   |                   |

|                  |      |                  |                              |                   |                 |                                |
|------------------|------|------------------|------------------------------|-------------------|-----------------|--------------------------------|
| time             | 1900 | <u>&lt;0.001</u> | 2>36                         | 26                | <u>0.015</u>    | 2>36                           |
| treatment x time | 102  | <u>&lt;0.001</u> | H2(A), C2(B), H36(B), C36(C) | 0.31              | 0.62            | H2(A), C2(AB), H36(BC), C36(C) |
| <i>cildyn</i>    |      |                  |                              | S4p               |                 | S4q                            |
| treatment        | 8.7  | <u>0.042</u>     | high>control                 | 1.1 <sup>a</sup>  | 0.36            |                                |
| time             | 48   | <u>&lt;0.01</u>  | 2>36                         | 5.2               | 0.11            | 2>36                           |
| treatment x time | 8.7  | <u>0.042</u>     | H2(A)>all others(B)          | 1.2               | 0.36            |                                |
| RNA helicase     |      |                  |                              | S4s               |                 | S4t                            |
| treatment        | 35   | <u>&lt;0.01</u>  | high>control                 | 0.23 <sup>a</sup> | 0.68            |                                |
| time             | 73   | <u>&lt;0.001</u> | 2>36                         | 1300              | <u>&lt;0.01</u> | 2>36                           |
| treatment x time | 34   | <u>&lt;0.01</u>  | H2(A), C2(B), H36(B), C36(C) | 75                | <u>0.013</u>    | H2(A), C2(A), H36(AB), C36(B)  |

<sup>a</sup>log-transformed data. <sup>b</sup>square root-transformed data. <sup>c</sup>rank-transformed data.

## Supplemental figure captions

**Fig. S1. Host coral metabolism, transport, and cell adhesion gene expression.** mRNA expression levels of genes (see full names in Table 1.) involved in metabolism (a-f), transport (g-o), and cell adhesion (p-u) were determined with either Illumina RNA-Seq (fragments per kilobases mapped [fpkm]; a, d, g, j, m, p, and s) or real-time PCR (inverse-log threshold cycle [C<sub>t</sub>] values normalized to recovery of the Solaris™ [Thermo-Scientific] RNA spike; b, e, h, k, n, q, and t) in both control (hollow diamonds of a, b, d, e, g, h, j, k, m, n, p, q, s, and t) and high temperature (black triangles of a, b, d, e, g, h, j, k, m, n, p, q, s, and t) samples. The correlation between these two techniques was also assessed for both the control (white and black diamonds at the 2 and 36-week sampling times, respectively) and high temperature (white and black triangles at the time 2 and 36-week sampling times, respectively) samples (c, f, i, l, o, r, and u), and linear regression *t*-tests were conducted to determine the significance of the correlations. In a, b, d, e, g, h, j, k, m, n, p, q, s, and t, error bars represent standard error of the mean. Letters adjacent to either control or high temperature icons in certain panels denote significance at  $p < 0.05$  by Tukey's honestly significant difference tests. One biological replicate from the control treatment group sampled after two weeks was considered to be an outlier and was neither analyzed nor plotted.

**Fig. S2. Expression of host coral genes involved in the stress response and other processes.** mRNA expression levels of genes (see full names in Table 1.) involved in the stress response (a-f) and other processes (g-r) were determined with either Illumina RNA-Seq (fragments per kilobases mapped [fpkm]; a, d, g, j, m, and p) or real-time PCR (inverse-log threshold cycle [C<sub>t</sub>] values normalized to recovery of the Solaris™ [Thermo-Scientific] RNA spike; b, e, h, k, n, and q) in both control (hollow diamonds of a, b, d, e, g, h, j, k, m, n, p, and q) and high temperature (black triangles of a, b, d, e, g, h, j, k, m, n, p, and q) samples. The correlation between these two



techniques was also assessed for both the control (white and black diamonds at the 2 and 36-week sampling times, respectively) and high temperature (white and black triangles at the time 2 and 36-week sampling times, respectively) samples (c, f, i, l, o, and r), and linear regression  $t$ -tests were conducted to determine the significance of the correlations. In a, b, d, e, g, h, j, k, m, n, p, and q, error bars represent standard error of the mean. Letters adjacent to either control or high temperature icons in certain panels denote significance at  $p < 0.05$  by Tukey's honestly significant difference tests. One biological replicate from the control treatment group sampled after two weeks was considered to be an outlier and was neither analyzed nor plotted.

**Fig. S3. *Symbiodinium* metabolism, ion transport, and photosynthesis gene expression.**

mRNA expression of genes (see full names in Table 1.) involved in metabolism (a-i), ion transport (j-r), and photosynthesis (s-aa) was determined with either Illumina RNA-Seq (fragments per kilobases mapped [fpkm]; a, d, g, j, m, p, s, v, and y) or real-time PCR (inverse-log threshold cycle [ $C_t$ ] values normalized to recovery of the Solaris™ [Thermo-Scientific] RNA spike; b, e, h, k, n, q, t, w, and z) in both control (hollow diamonds of a, b, d, e, g, h, j, k, m, n, p, q, s, t, v, w, y, and z) and high temperature (black triangles of a, b, d, e, g, h, j, k, m, n, p, q, s, t, v, w, y, and z) samples. The correlation between these techniques was assessed for both control (white and black diamonds at the 2 and 36-week sampling times, respectively) and high temperature (white and black triangles at the time 2 and 36-week sampling times, respectively) samples (c, f, i, l, o, r, u, x, and aa), and linear regression  $t$ -tests were conducted to determine the significance of the correlations. In a, b, d, e, g, h, j, k, m, n, p, q, s, t, v, w, y, and z, error bars represent standard error of the mean. Letters adjacent to either control or high temperature icons in certain panels denote significance ( $p < 0.05$ ) by Tukey's honestly significant difference tests. One biological replicate from the control treatment group sampled after two weeks was considered to be an outlier and was neither analyzed nor plotted.

**Fig. S4. Expression of *Symbiodinium* genes involved in the stress response and other processes.** mRNA expression of genes (see full names in Table 1.) involved in the stress response (a-o) and other processes (p-u) was determined with either Illumina RNA-Seq (fragments per kilobases mapped [fpkm]; a, d, g, j, m, p, and s) or real-time PCR (inverse-log threshold cycle [ $C_t$ ] values normalized to recovery of the Solaris™ [Thermo-Scientific, USA] RNA spike; b, e, h, k, n, q, and t) in both control (hollow diamonds of a, b, d, e, g, h, j, k, m, n, p, q, s, and t) and high temperature (black triangles of a, b, d, e, g, h, j, k, m, n, p, q, s, and t) samples. The correlation between these two techniques was assessed across the control (white and black diamonds at the 2 and 36-week sampling times, respectively) and high temperature (white and black triangles at the time 2 and 36-week sampling times, respectively) samples (c, f, i, l, o, and r), and linear regression *t*-tests were conducted to determine the significance of the correlations. In a, b, d, e, g, h, j, k, m, n, p, q, s, and t error bars represent standard error of the mean. Letters adjacent to either control or high temperature icons in certain panels denote significance at  $p < 0.05$  by Tukey's honestly significant difference tests. One biological replicate from the control treatment group sampled after two weeks was considered to be an outlier and was neither analyzed nor plotted.

**Fig. S1 Illumina (fpkm)****real-time PCR****correlation****metabolism**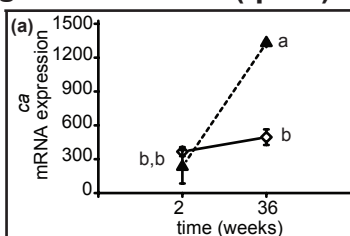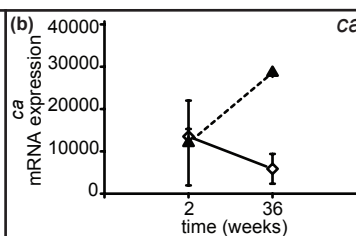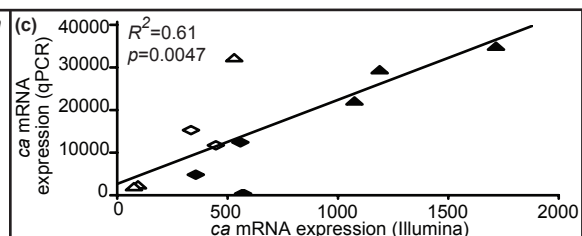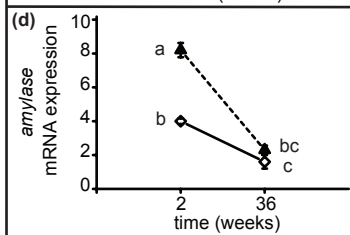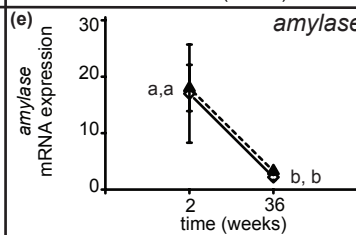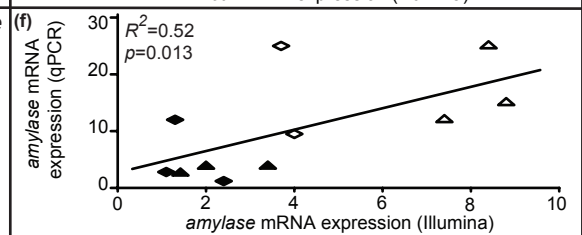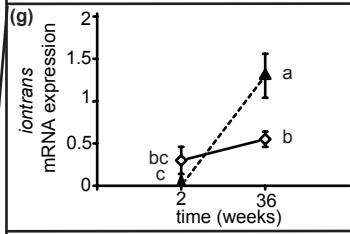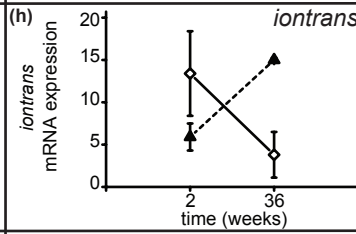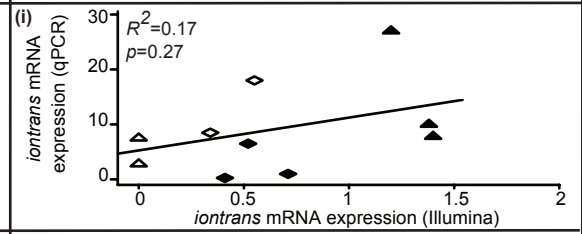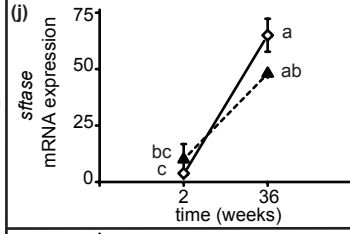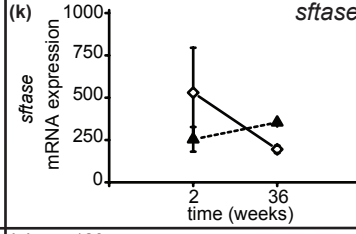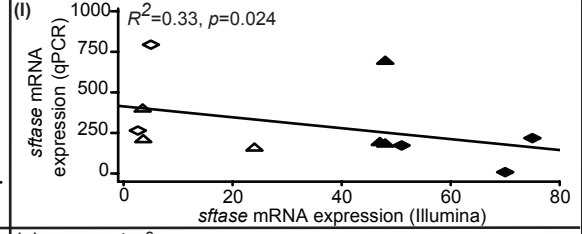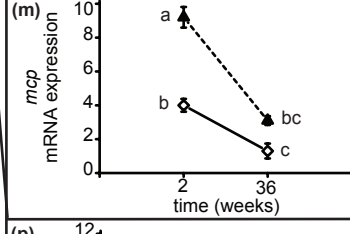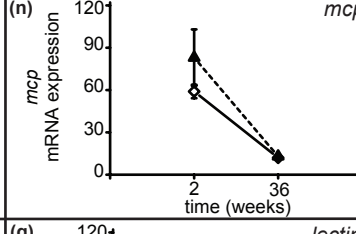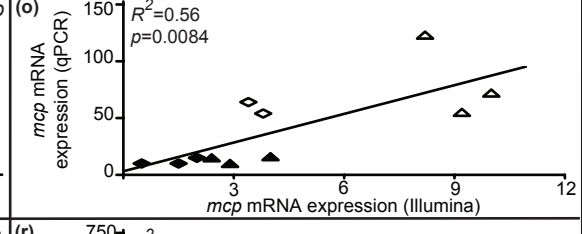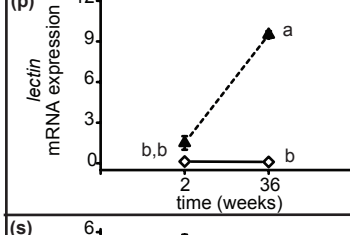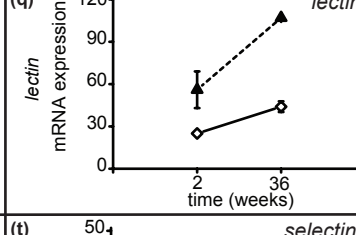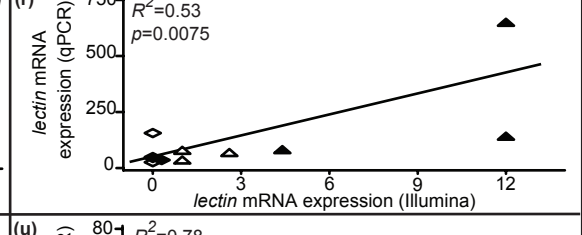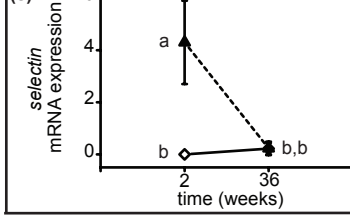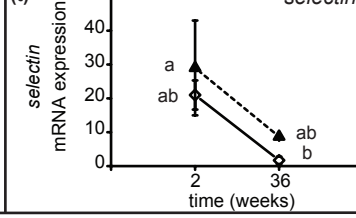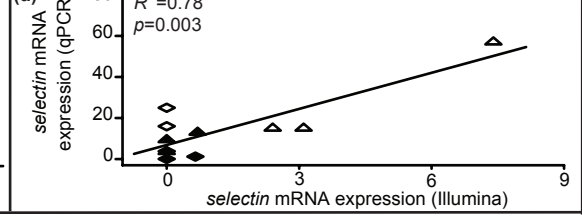**transport****cell adhesion**

**Fig. S2 Illumina (fpkm)****real-time PCR****correlation****stress response****other processes**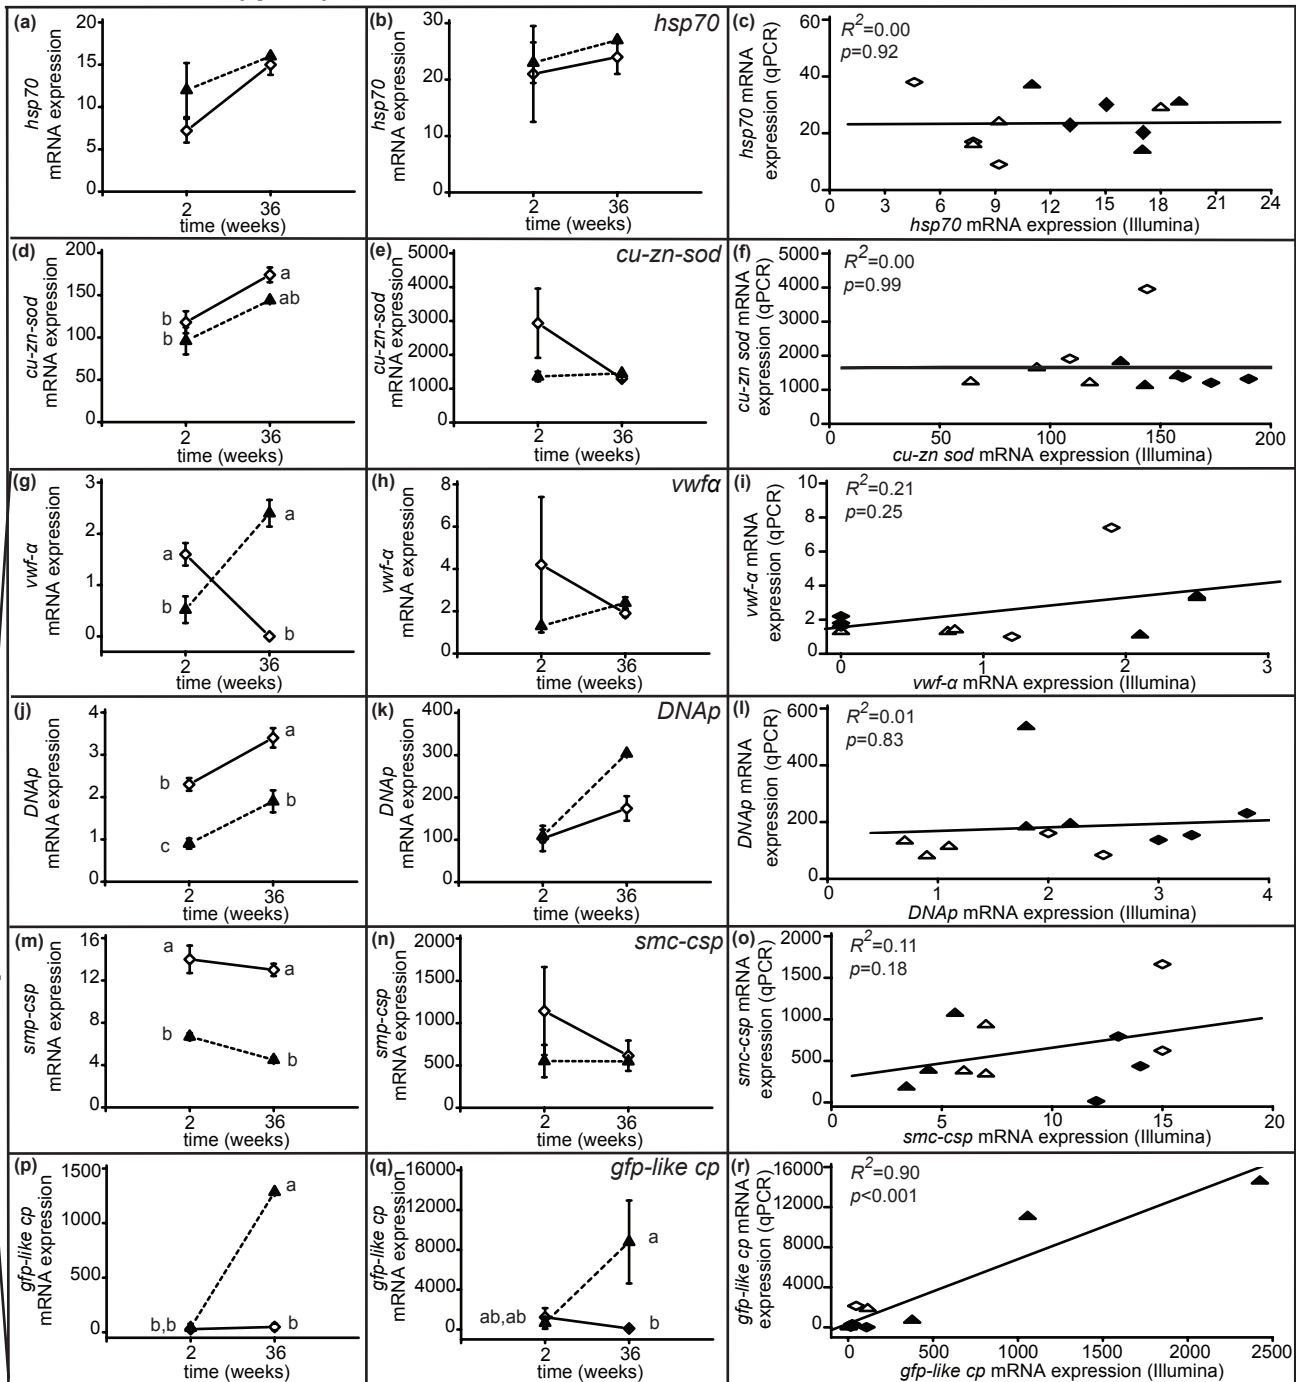

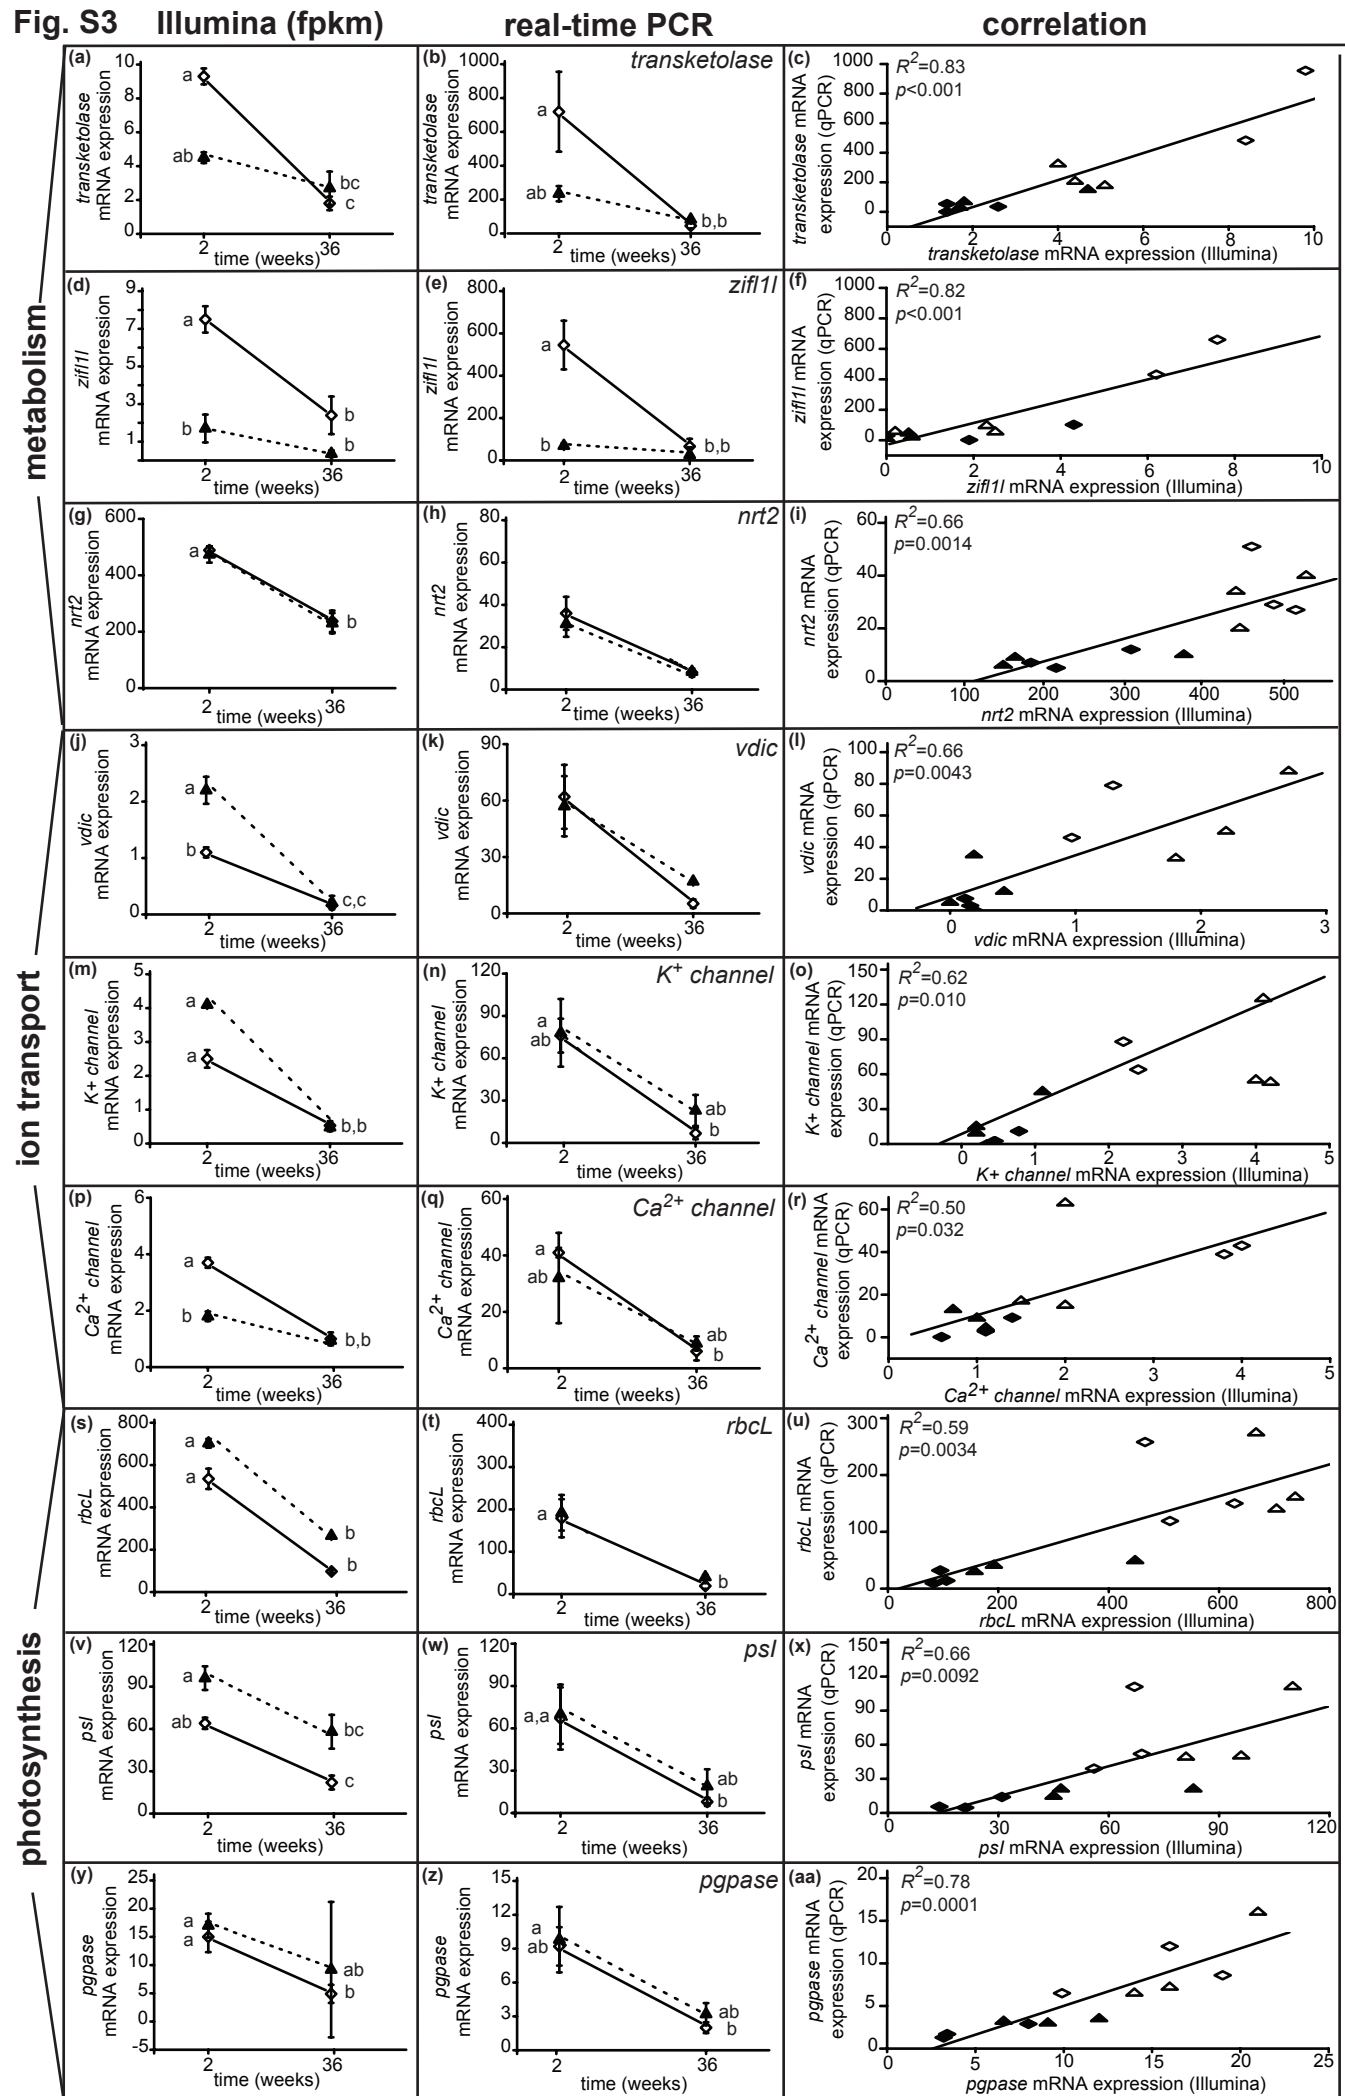

**Fig. S4** Illumina (fpkm)

real-time PCR

correlation

stress response

other processes

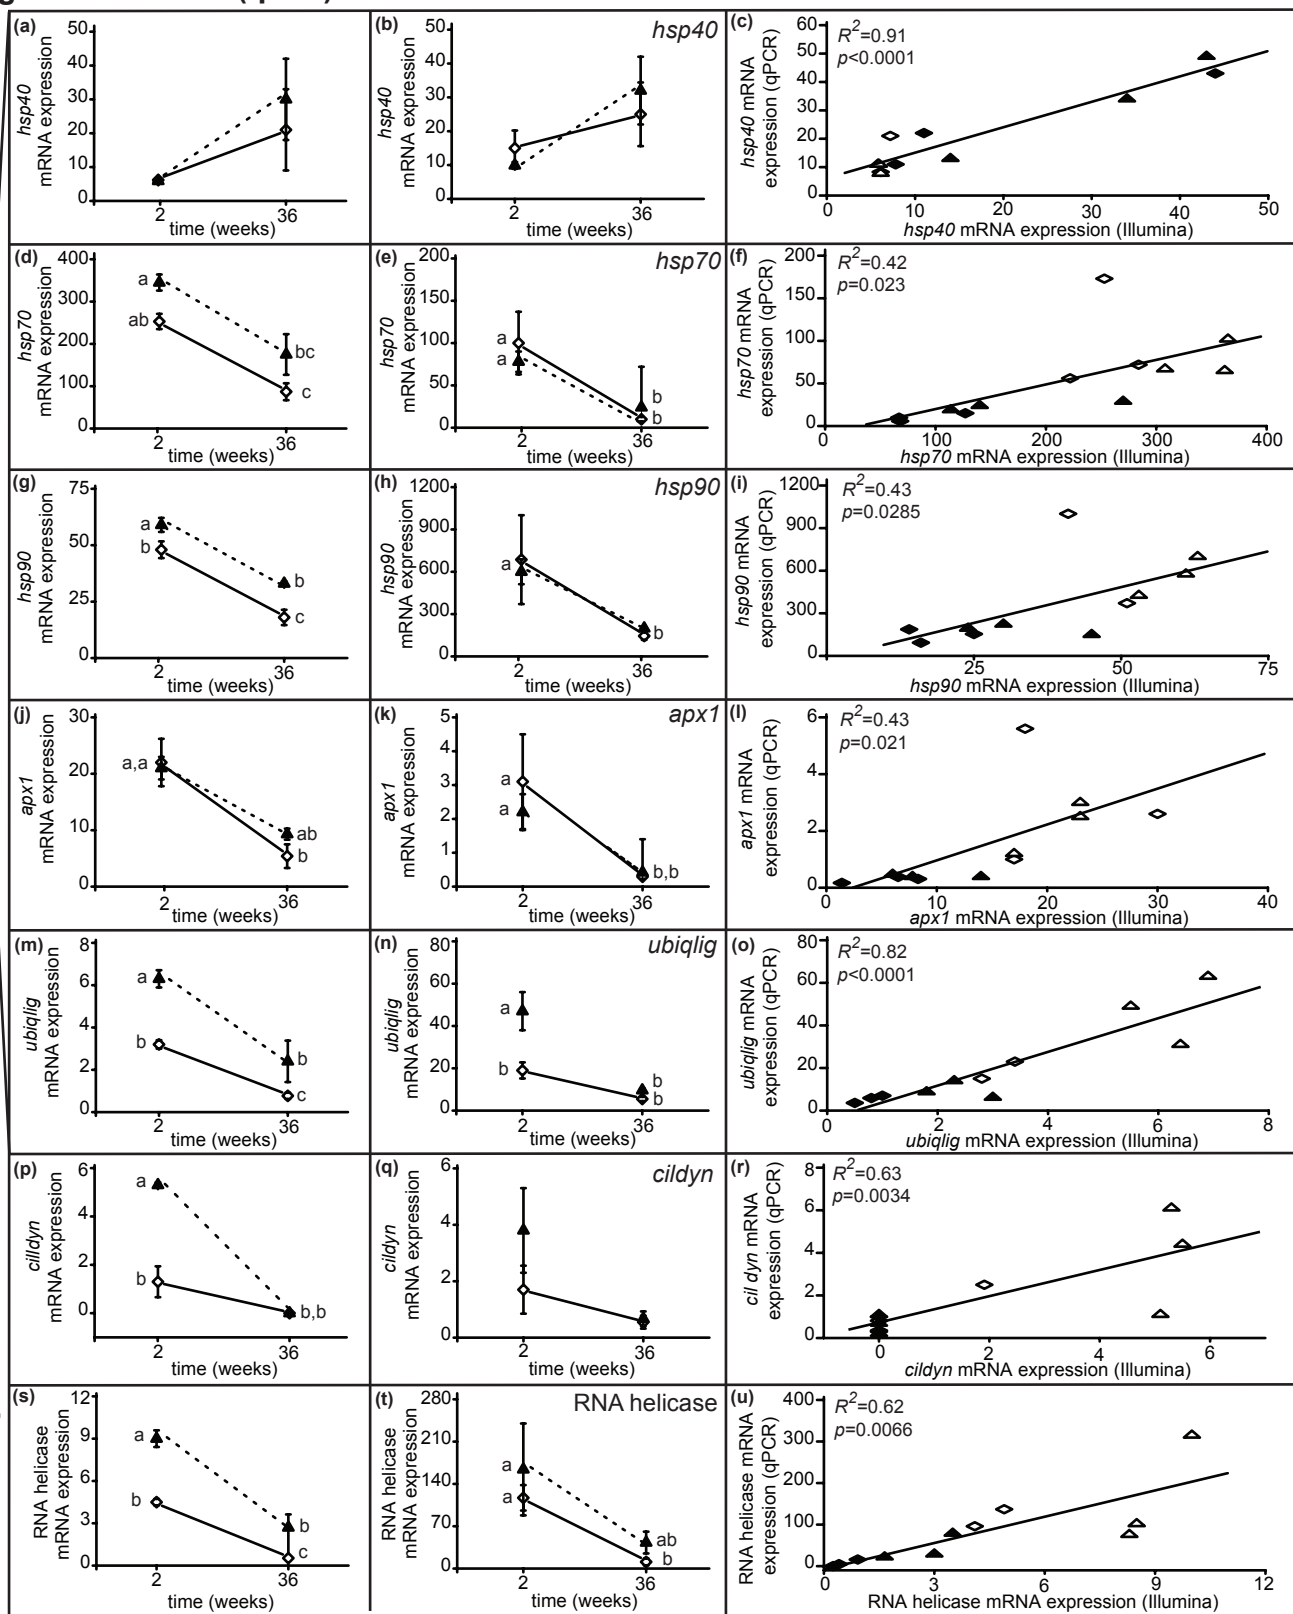

Supplement: mec0023-5816-SD1.pdf [file mec0023-5816-SD1.pdf]
